# Supplementary material for: Antioxidant Quercetin 3-O-Glycosylated Plant Flavonols Contribute to Transthyretin Stabilization
Source: MDPI journal article supplement (doi:10.3390/cryst12050638), 2022-04-29
Supplement: s1 [file s1]

## Supplementary Materials

# Antioxidant Quercetin 3-O-Glycosylated Plant Flavonols Contribute to Transthyretin Stabilization

Lidia Ciccone <sup>1,\*</sup>, Nicolò Tonali <sup>2</sup>, Carole Fruchart-Gaillard <sup>3</sup>, Lucia Barlettani <sup>1</sup>, Armando Rossello <sup>1,4</sup>,  
Alessandra Braca <sup>1,5</sup>, Elisabetta Orlandini <sup>4,6</sup> and Susanna Nencetti <sup>1,5</sup>

<sup>1</sup> Department of Pharmacy, University of Pisa, 56126 Pisa, Italy; l.barlettani@studenti.unipi.it (L.B.), armando.rossello@unipi.it (A.R.), alessandra.braca@unipi.it (A.B.), susanna.memcetti@unipi.it (S.N.)

<sup>2</sup> CNRS, BioCIS, Université Paris-Saclay, 92290 Châtenay-Malabry, France; nicolo.tonali@universite-paris-saclay.fr

<sup>3</sup> Département Médicaments et Technologies pour la Santé (DMTS), SIMoS, CEA, INRAE, Université Paris Saclay, 91191 Gif-Sur-Yvette, France, carole.fruchart@cea.fr

<sup>4</sup> Research Center “E. Piaggio”, Università di Pisa, 56122 Pisa, Italy, elisabetta.orlandini@unipi.it

<sup>5</sup> Interdepartmental Research Centre Nutraceuticals and Food for Health (NUTRAFOOD), University of Pisa, 56126 Pisa, Italy

<sup>6</sup> Department of Earth Sciences, University of Pisa, 56100 Pisa, Italy

\* Correspondence: lidia.ciccone@unipi.it

## Table of Contents

**Figure S1.** OMIT map of QUE 3-O- $\beta$ -D-galactopyranoside

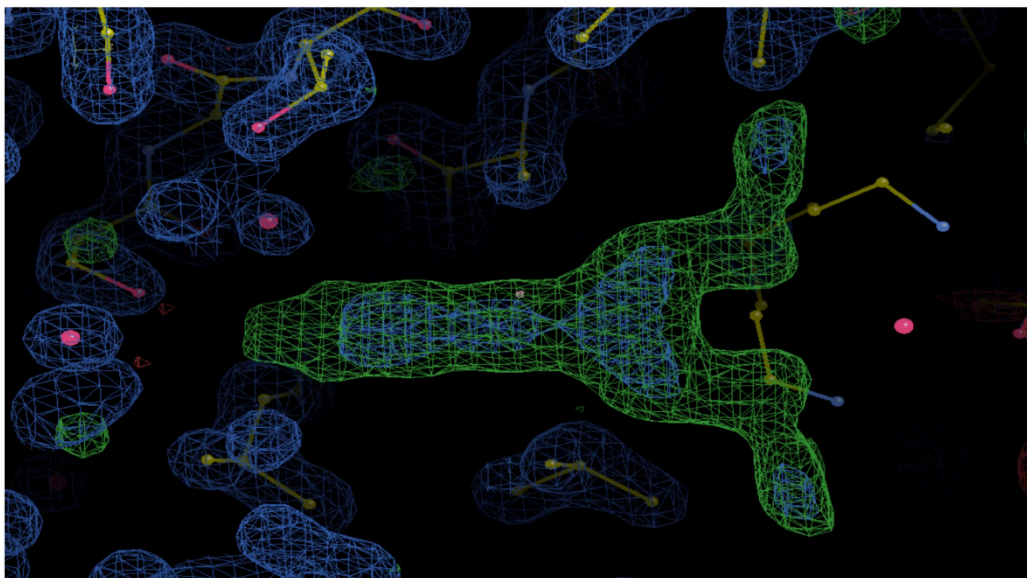

**Figure S1.** Screenshot of COOT graphic interface. OMIT map of QUE 3-O-β-D-galactopyranoside contoured at 3σ.
